# Supplementary material for: Differential expression of cell cycle regulators in CDK5-dependent medullary thyroid carcinoma tumorigenesis
Source: PubMed Central journal article supplement (PMC4494924; doi:10.18632/oncotarget.3813), 2015-04-14
Supplement: oncotarget-06-12080-s001.pdf [file oncotarget-06-12080-s001.pdf]

## Differential expression of cell cycle regulators in CDK5-dependent medullary thyroid carcinoma tumorigenesis

### Supplementary Material

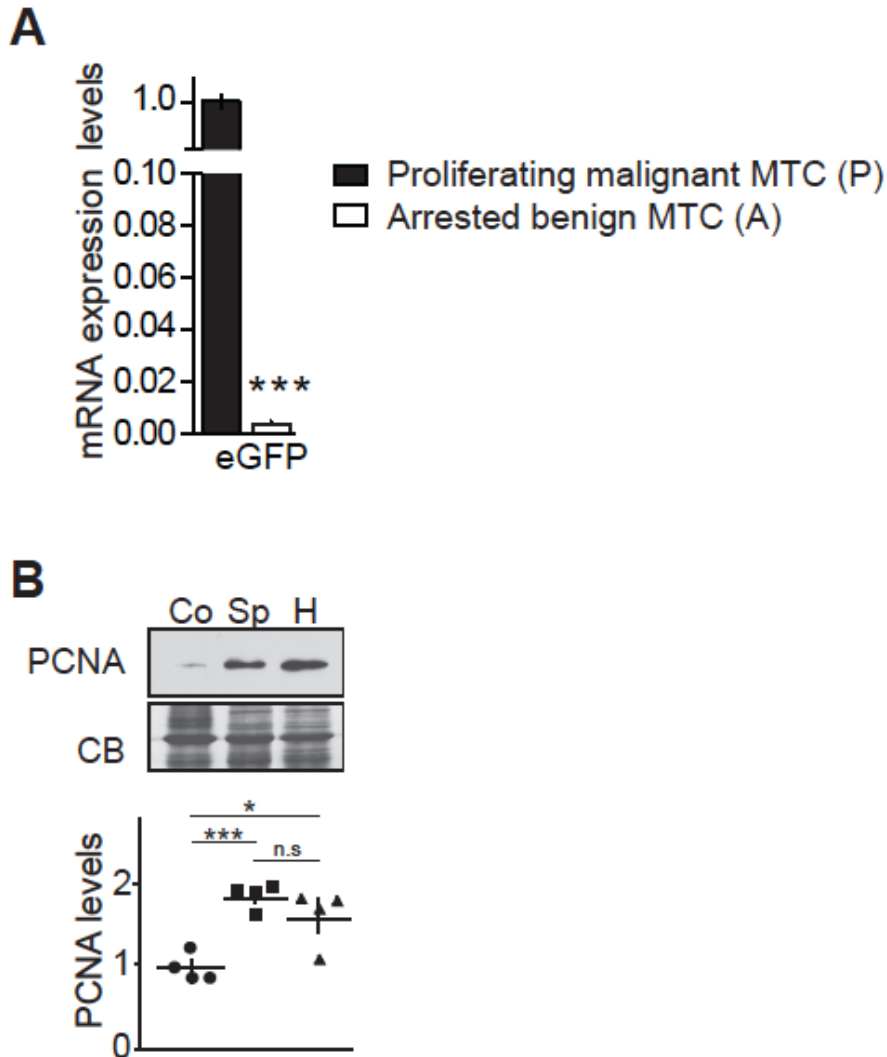

**Figure S1.** (A) RT-qPCR analysis of eGFP mRNA expression in proliferating malignant mouse MTC compared to arrested benign mouse MTCs; p-value < 0.0001 (N = 6 for each conditions). (B) Immunoblot of lysates from control, sporadic and hereditary human MTC probed with anti-PCNA antibodies. P-values were p = 0.2419 for Sp vs H, p = 0.0003 for Sp vs Co and p = 0.0223 for H vs Co. Data are represented as mean +/- SEM, N = 4 for each condition.

**Table S1:** A Table showing genes that are upregulated in proliferating malignant compared to arrested benign mouse MTCs. Genes that are mentioned in the main text are bolded.

| GENE SYMBOL   | LOG2-FOLD UPREGULATION | P-VALUE        | GENE DESCRIPTION                                                                    |
|---------------|------------------------|----------------|-------------------------------------------------------------------------------------|
| eGFP          | 6.88                   | 0.00006        |                                                                                     |
| Troap         | 5.2                    | 0.00000        | trophinin associated protein                                                        |
| Pbk           | 5.1                    | 0.00005        | PDZ binding kinase                                                                  |
| Spc25         | 4.95                   | 0.00003        | SPC25, NDC80 kinetochore complex component, homolog ( <i>S. cerevisiae</i> )        |
| LOC640739     | 4.91                   | 0.00000        | hypothetical protein LOC640739                                                      |
| 2810417H13Rik | 4.9                    | 0.00034        | predicted gene 15428; RIKEN cDNA 2810417H13 gene; predicted gene 9171               |
| Kif18b        | 4.68                   | 0.00070        | kinesin family member 18B                                                           |
| <b>Birc5</b>  | <b>4.63</b>            | <b>0.00000</b> | <b>budding uninhibited by benzimidazoles 1 homolog, beta (<i>S. cerevisiae</i>)</b> |
| Clspn         | 4.62                   | 0.00002        | claspin homolog ( <i>Xenopus laevis</i> )                                           |
| Gtse1         | 4.44                   | 0.00000        | G two S phase expressed protein 1                                                   |
| Ckap2         | 4.43                   | 0.00037        | cytoskeleton associated protein 2                                                   |
| Crabp1        | 4.38                   | 0.00024        | cellular retinoic acid binding protein I                                            |
| LOC100042970  | 4.31                   | 0.00006        |                                                                                     |
| Brrn1         | 4.29                   | 0.00001        | barren homolog ( <i>Drosophila</i> )                                                |
| Arhgef39      | 4.26                   | 0.00056        | Rho guanine nucleotide exchange factor (GEF) 39                                     |
| <b>Cdc2a</b>  | <b>4.22</b>            | <b>0.00013</b> | <b>cyclin-dependent kinase 1</b>                                                    |
| <b>Plk1</b>   | <b>4.18</b>            | <b>0.00108</b> | <b>polo-like kinase 1 (<i>Drosophila</i>)</b>                                       |
| <b>Rad51</b>  | <b>4.18</b>            | <b>0.00010</b> | <b>RAD51 homolog (<i>S. cerevisiae</i>)</b>                                         |
| Cdca3         | 4.14                   | 0.00028        | cell division cycle associated 3                                                    |
| <b>Ccnb1</b>  | <b>4.13</b>            | <b>0.00008</b> | <b>cyclin B1</b>                                                                    |
| Ncaph         | 4.12                   | 0.00084        | non-SMC condensin I complex, subunit H                                              |
| Knstrn        | 4.06                   | 0.00039        | kinetochore-localized astrin/SPAG5 binding                                          |
| <b>Aurkb</b>  | <b>4.06</b>            | <b>0.00114</b> | <b>aurora kinase B</b>                                                              |
| <b>Rrm2</b>   | <b>4.05</b>            | <b>0.00007</b> | <b>ribonucleotide reductase M2</b>                                                  |
| Cenpa         | 4.03                   | 0.00076        | centromere protein A                                                                |
| <b>Cdkn3</b>  | <b>4.01</b>            | <b>0.00043</b> | <b>cyclin-dependent kinase inhibitor 3</b>                                          |
| LOC667005     | 4.01                   | 0.00068        |                                                                                     |
| Clhc1         | 4                      | 0.00098        | clathrin heavy chain linker domain containing 1                                     |
| Kif4          | 3.91                   | 0.00006        | kinesin family member 4                                                             |
| Nusap1        | 3.85                   | 0.00024        | nucleolar and spindle associated protein 1                                          |
| Spag5         | 3.85                   | 0.00066        | sperm associated antigen 5                                                          |
| Sgol1         | 3.83                   | 0.00053        | shugoshin-like 1 ( <i>S. pombe</i> )                                                |

|               |             |                |                                                                                                                                                                                                                                                        |
|---------------|-------------|----------------|--------------------------------------------------------------------------------------------------------------------------------------------------------------------------------------------------------------------------------------------------------|
| Uhrf1         | 3.83        | 0.00008        | ubiquitin-like, containing PHD and RING finger domains, 1; predicted gene 5648; similar to nuclear zinc finger protein Np95                                                                                                                            |
| Top2a         | 3.78        | 0.00010        | topoisomerase (DNA) II alpha                                                                                                                                                                                                                           |
| Cit           | 3.77        | 0.00055        | citron                                                                                                                                                                                                                                                 |
| Prc1          | 3.77        | 0.00022        | protein regulator of cytokinesis 1                                                                                                                                                                                                                     |
| Esco2         | 3.76        | 0.00048        | establishment of cohesion 1 homolog 2 ( <i>S. cerevisiae</i> )                                                                                                                                                                                         |
| <b>Mcm10</b>  | <b>3.76</b> | <b>0.00000</b> | <b>minichromosome maintenance deficient 10 (<i>S. cerevisiae</i>)</b>                                                                                                                                                                                  |
| Cenpi         | 3.74        | 0.00003        | centromere protein I                                                                                                                                                                                                                                   |
| Kif15         | 3.66        | 0.00009        | kinesin family member 15                                                                                                                                                                                                                               |
| Mki67         | 3.62        | 0.00013        | antigen identified by monoclonal antibody Ki 67                                                                                                                                                                                                        |
| Cdca8         | 3.56        | 0.00003        | cell division cycle associated 8                                                                                                                                                                                                                       |
| C79407        | 3.56        | 0.00022        | expressed sequence C79407                                                                                                                                                                                                                              |
| Cdc20         | 3.54        | 0.00005        | cell division cycle 20 homolog ( <i>S. cerevisiae</i> )                                                                                                                                                                                                |
| Hist1h2ag     | 3.53        | 0.00001        | histone cluster 1, H2ad; histone cluster 1, H2ae; histone cluster 1, H2ag; histone cluster 1, H2ah; histone cluster 1, H2ai; similar to histone 2a; histone cluster 1, H2an; histone cluster 1, H2ao; histone cluster 1, H2ac; histone cluster 1, H2ab |
| <b>Ccne2</b>  | <b>3.52</b> | <b>0.00062</b> | <b>cyclin E2</b>                                                                                                                                                                                                                                       |
| Ckap2l        | 3.49        | 0.00010        | cytoskeleton associated protein 2-like                                                                                                                                                                                                                 |
| <b>Cdc25c</b> | <b>3.45</b> | <b>0.00040</b> | <b>cell division cycle 25 homolog C (<i>S. pombe</i>)</b>                                                                                                                                                                                              |
| Kif23         | 3.42        | 0.00002        | kinesin family member 23                                                                                                                                                                                                                               |
| Sapcd2        | 3.41        | 0.00005        | suppressor APC domain containing 2                                                                                                                                                                                                                     |
| Iqgap3        | 3.39        | 0.00024        | IQ motif containing GTPase activating protein 3                                                                                                                                                                                                        |
| Cenpm         | 3.34        | 0.00002        | centromere protein M                                                                                                                                                                                                                                   |
| Kif11         | 3.32        | 0.00114        | kinesin family member 11                                                                                                                                                                                                                               |
| Cd177         | 3.32        | 0.00078        | CD177 antigen                                                                                                                                                                                                                                          |
| Chek1         | 3.27        | 0.00005        | checkpoint kinase 1 homolog ( <i>S. pombe</i> )                                                                                                                                                                                                        |
| Hist1h2ah     | 3.23        | 0.00006        | histone cluster 1, H2ad; histone cluster 1, H2ae; histone cluster 1, H2ag; histone cluster 1, H2ah; histone cluster 1, H2ai; similar to histone 2a; histone cluster 1, H2an; histone cluster 1, H2ao; histone cluster 1, H2ac; histone cluster 1, H2ab |
| Sgol2         | 3.23        | 0.00002        | shugoshin-like 2 ( <i>S. pombe</i> )                                                                                                                                                                                                                   |
| Ncapg2        | 3.2         | 0.00009        | non-SMC condensin II complex, subunit G2                                                                                                                                                                                                               |
| Dmkn          | 3.19        | 0.00032        | dermokine                                                                                                                                                                                                                                              |
| Ska3          | 3.18        | 0.00049        | spindle and kinetochore associated complex subunit 3                                                                                                                                                                                                   |
| Hist1h2ak     | 3.17        | 0.00003        | histone cluster 1, H2ak                                                                                                                                                                                                                                |
| Hist1h2ad     | 3.13        | 0.00024        | histone cluster 1, H2ad; histone cluster 1, H2ae; histone cluster 1, H2ag; histone                                                                                                                                                                     |

|                  |             |                |                                                                                                                                                                                                                                                        |
|------------------|-------------|----------------|--------------------------------------------------------------------------------------------------------------------------------------------------------------------------------------------------------------------------------------------------------|
|                  |             |                | cluster 1, H2ah; histone cluster 1, H2ai; similar to histone 2a; histone cluster 1, H2an; histone cluster 1, H2ao; histone cluster 1, H2ac; histone cluster 1, H2ab                                                                                    |
| Rad54b           | 3.13        | 0.00101        | RAD54 homolog B ( <i>S. cerevisiae</i> )                                                                                                                                                                                                               |
| Cenpn            | 3.12        | 0.00011        | centromere protein N                                                                                                                                                                                                                                   |
| <b>Ccna1</b>     | <b>3.1</b>  | <b>0.00058</b> | <b>cyclin A1</b>                                                                                                                                                                                                                                       |
| 2210011C24Rik    | 3.05        | 0.00000        | RIKEN cDNA 2210011C24 gene                                                                                                                                                                                                                             |
| Depdc1b          | 3.05        | 0.00020        | DEP domain containing 1B                                                                                                                                                                                                                               |
| <b>Hmgb2</b>     | <b>3.05</b> | <b>0.00008</b> | <b>predicted gene 13160; predicted gene 8681; predicted gene 13237; predicted gene 4169; predicted gene 8284; similar to High mobility group box 2; predicted gene 13167; high mobility group box 2; predicted gene 13232</b>                          |
| Cenph            | 3.02        | 0.00033        | centromere protein H                                                                                                                                                                                                                                   |
| Kif18a           | 2.92        | 0.00077        | kinesin family member 18A                                                                                                                                                                                                                              |
| Hist1h2af        | 2.87        | 0.00001        | histone cluster 1, H2af                                                                                                                                                                                                                                |
| <b>Tcf19</b>     | <b>2.86</b> | <b>0.00003</b> | <b>transcription factor 19</b>                                                                                                                                                                                                                         |
| Nrm              | 2.85        | 0.00010        | nurim (nuclear envelope membrane protein)                                                                                                                                                                                                              |
| Cep55            | 2.83        | 0.00033        | centrosomal protein 55                                                                                                                                                                                                                                 |
| <b>Hist2h2ab</b> | <b>2.82</b> | <b>0.00011</b> | <b>histone cluster 2, H2ab</b>                                                                                                                                                                                                                         |
| Hist1h2an        | 2.81        | 0.00010        | histone cluster 1, H2ad; histone cluster 1, H2ae; histone cluster 1, H2ag; histone cluster 1, H2ah; histone cluster 1, H2ai; similar to histone 2a; histone cluster 1, H2an; histone cluster 1, H2ao; histone cluster 1, H2ac; histone cluster 1, H2ab |
| Oip5             | 2.78        | 0.00058        | Opa interacting protein 5                                                                                                                                                                                                                              |
| BC004701         | 2.76        | 0.00029        | baculoviral IAP repeat-containing 5                                                                                                                                                                                                                    |
| <b>Tyms</b>      | <b>2.74</b> | <b>0.00019</b> | <b>thymidylate synthase</b>                                                                                                                                                                                                                            |
| Fbln1            | 2.7         | 0.00108        | fibulin 1                                                                                                                                                                                                                                              |
| <b>Rad51ap1</b>  | <b>2.69</b> | <b>0.00076</b> | <b>RAD51 associated protein 1</b>                                                                                                                                                                                                                      |
| Chaf1b           | 2.68        | 0.00045        | chromatin assembly factor 1, subunit B (p60)                                                                                                                                                                                                           |
| Pif1             | 2.67        | 0.00015        | PIF1 5'-to-3' DNA helicase homolog ( <i>S. cerevisiae</i> )                                                                                                                                                                                            |
| Tmem91           | 2.61        | 0.00068        | transmembrane protein 91                                                                                                                                                                                                                               |
| Gins1            | 2.6         | 0.00040        | GINS complex subunit 1 (Psf1 homolog)                                                                                                                                                                                                                  |
| Bub1b            | 2.54        | 0.00023        | budding uninhibited by benzimidazoles 1 homolog, beta ( <i>S. cerevisiae</i> )                                                                                                                                                                         |
| Fam132b          | 2.53        | 0.00101        | family with sequence similarity 132, member B                                                                                                                                                                                                          |
| Rad54l           | 2.47        | 0.00064        | RAD54 like ( <i>S. cerevisiae</i> )                                                                                                                                                                                                                    |
| Hist1h2ai        | 2.44        | 0.00012        | histone cluster 1, H2ad; histone cluster 1, H2ae; histone cluster 1, H2ag; histone cluster 1, H2ah; histone cluster 1, H2ai; similar to histone 2a; histone cluster 1, H2an; histone cluster 1, H2ao; histone                                          |

|                  |             |                |                                                                                                                                   |
|------------------|-------------|----------------|-----------------------------------------------------------------------------------------------------------------------------------|
|                  |             |                | cluster 1, H2ac; histone cluster 1, H2ab                                                                                          |
| Tyms-ps          | 2.44        | 0.00006        | thymidylate synthase, pseudogene                                                                                                  |
| Ifi27            | 2.43        | 0.00050        | interferon, alpha-inducible protein 27                                                                                            |
| <b>Melk</b>      | <b>2.42</b> | <b>0.00005</b> | <b>maternal embryonic leucine zipper kinase</b>                                                                                   |
| Psrc1            | 2.42        | 0.00063        | proline/serine-rich coiled-coil 1                                                                                                 |
| B230323D24Rik    | 2.39        | 0.00073        |                                                                                                                                   |
| Phf19            | 2.36        | 0.00014        | PHD finger protein 19                                                                                                             |
| Cthrc1           | 2.35        | 0.00061        | collagen triple helix repeat containing 1                                                                                         |
| Cenpw            | 2.33        | 0.00007        | centromere protein W                                                                                                              |
| <b>Recql4</b>    | <b>2.31</b> | <b>0.00011</b> | <b>RecQ protein-like 4</b>                                                                                                        |
| Pkmyt1           | 2.28        | 0.00029        | protein kinase, membrane associated tyrosine/threonine 1                                                                          |
| scl0002507.1_236 | 2.26        | 0.00044        |                                                                                                                                   |
| Kcne2            | 2.25        | 0.00009        | potassium voltage-gated channel, Isk-related subfamily, gene 2                                                                    |
| Gas2l3           | 2.24        | 0.00012        | similar to growth arrest-specific 2 like 3; growth arrest-specific 2 like 3                                                       |
| Slc4a1           | 2.22        | 0.00053        | solute carrier family 4 (anion exchanger), member 1                                                                               |
| Ccr5             | 2.21        | 0.00008        | chemokine (C-C motif) receptor 5                                                                                                  |
| <b>Pcna</b>      | <b>2.21</b> | <b>0.00071</b> | <b>proliferating cell nuclear antigen; similar to proliferating cell nuclear antigen (DNA polymerase delta auxiliary protein)</b> |
| Dbf4             | 2.2         | 0.00050        | DBF4 homolog ( <i>S. cerevisiae</i> )                                                                                             |
| <b>Fam111a</b>   | <b>2.19</b> | <b>0.00001</b> | <b>family with sequence similarity 111, member A</b>                                                                              |
| <b>Tmpo</b>      | <b>2.16</b> | <b>0.00033</b> | <b>thymopoietin</b>                                                                                                               |
| Mad2l1           | 2.15        | 0.00014        | similar to spindle assembly checkpoint protein; MAD2 mitotic arrest deficient-like 1 (yeast)                                      |
| Spink4           | 2.14        | 0.00033        | serine peptidase inhibitor, Kazal type 4                                                                                          |
| Smc4             | 2.13        | 0.00003        | structural maintenance of chromosomes 4                                                                                           |
| Fabp5            | 2.12        | 0.00043        | fatty acid binding protein 5, epidermal                                                                                           |
| 4930427A07Rik    | 2.11        | 0.00048        | RIKEN cDNA 4930427A07 gene                                                                                                        |
| LOC245892        | 2.1         | 0.00037        |                                                                                                                                   |
| Arpp21           | 2.06        | 0.00027        | cyclic AMP-regulated phosphoprotein, 21                                                                                           |
| Ddx11            | 2.03        | 0.00109        | DEAD/H (Asp-Glu-Ala-Asp/His) box polypeptide 11 (CHL1-like helicase homolog, <i>S. cerevisiae</i> )                               |

**Table S2:** A Table showing downregulated genes in proliferating malignant compared to arrested benign mouse MTCs

| <b>GENE SYMBOL</b> | <b>LOG2-FOLD UPREGULATION</b> | <b>P-VALUE</b> | <b>GENE DESCRIPTION</b>              |
|--------------------|-------------------------------|----------------|--------------------------------------|
| Epb4.1l5           | -2.54                         | 0.001          | erythrocyte protein band 4.1-like 5  |
| KIF17              | -2.45                         | 0.001          | kinesin family member 17             |
| Leprel1            | -2.23                         | 0.001          | leprecan-like 1                      |
| Lgals4             | -2.21                         | 0.000          | lectin, galactose binding, soluble 4 |
| LOC385274          | -2.19                         | 0.001          |                                      |
| Luzp2              | -2.36                         | 0.001          | leucine zipper protein 2             |
| Mtap2              | -3.52                         | 0.000          | microtubule-associated protein 2     |

**Supplemental methods:** analysis of somatic RET mutation

Genomic DNA was isolated from dissected sections containing at least 80% of neoplastic cells using the QIAamp DNA FFPE tissue kit (QIAGEN, Valencia, CA) according to the manufacturer's instructions. DNA was amplified by PCR using primers flanking known mutational hotspots (see Table below). PCR reactions were performed in 25  $\mu$ L and consisted of: 1 $\times$  PCR buffer, 250 ng of genomic DNA, 0.4  $\mu$ mol/L each primer, 0.1 mmol/L each deoxynucleoside triphosphates, 0.75 unit of TaKaRa LA Taq DNA Polymerase (TaKaRa Bio USA, Madison, WI). After an initial cycle of denaturation at 94°C for 3 minutes, amplifications were performed as follows: 40 cycles of denaturation at 94°C for 45 seconds, annealing at 58°C for 30 seconds, and extension at 72°C for 90 seconds with and final extension at 72°C for 10 minutes. The PCR products were cleaned up with ExoSAP-IT (USB, Cleveland, OH) according to manufacturer instructions and sent to the core facility for sequencing using nested primers.

| EXON | FORWARD PRIMER SEQUENCE (5'-3') | REVERSE PRIMER SEQUENCE (5'-3') | SEQUENCING PRIMER (5'-3') |
|------|---------------------------------|---------------------------------|---------------------------|
| 10   | GGCTAAGCCAAGCTG<br>CTG          | CCATGAAACTTCCCTCCC<br>TC        | TATGCTTGCGACACCAGTTG      |
| 11   | GTTCTCAGGCCTTCCC<br>ACAC        | TGCGGGGCAGGGAAGAT<br>CCCC       | ACACCTCCATGGCCACTTC       |
| 13   | CTCTCTGTCTGAACTT<br>GGGC        | CTACTGCTCCTGCCCTGT<br>T         | AGGTCCATCCTGACCTGGTA      |
| 14   | TCCACCCCCTTACTCA<br>TTGG        | GGAAAGATACCGAAGATT<br>AGTG      | GCATGGTGGGCTAGAGTGT<br>G  |
| 15   | TCCACCCCCTTACTCA<br>TTGG        | GGAAAGATACCGAAGATT<br>AGTG      | CATGTCACACCCTGACTCCA      |
| 16   | ACTCCCGCCAGCATCT<br>CAG         | GTTCTGTGAGGCAAATGG<br>CT        | GCCCCTTCAAAGATGTGTGT      |

Exons 14 and 15 were amplified as a single PCR product

**Table S3:** Primers used for the RT-qPCR analyses

| GENE NAME   | GENE SYMBOL | ACCESSION NO | PRIMER SEQUENCE 5' - 3'                                    | AMPLICON (BP) |
|-------------|-------------|--------------|------------------------------------------------------------|---------------|
|             | eGFP        |              | F: ATCATGGCCGACAAGCAGAAGAAC<br>R: GTACAGCTCGTCCATGCCGAGAGT | 257           |
|             | B2m         | NM009735     | F: TGCTATCCAGAAAACCCCTCAA<br>R: CAATGTGAGGCGGGTGGAA        | 110           |
| p15INK4b    | cdkn2b      | NM007670     | F: AGCTGGATCTGGTCCTTGAG<br>R: GATCCAAGAATTTCCCTTGC         | 130           |
| p16INK4a    | cdkn2a      | NM009877     | F: CAAGAGCGGGGACATCAAGA<br>R: TTGAGCTGAAGCTATGCCCG         | 127           |
| p18INK4c    | cdkn2c      | NM007671     | F: GGCTGTCCGTTTCACTAT CA<br>R: TTTTGAAGGATTTGGCTGCT        | 85            |
| p19INK4d    | cdkn2d      | NM009878     | F: TTGAAGAAGGGAGTGGGAGGA<br>R: ACCGTTTAGATGGCTGTTGC        | 153           |
| p21CIP/WAF1 | cdkn1a      | NM007669     | F: GTA CTTCCTCTGCCCTGCTG<br>R: TCTGCGCTTGGAGTGATAGA        | 173           |
| p27KIP      | cdkn1b      | NM009875     | F: GTCCAGGGATGAGGAAGCGAC<br>R: CAGTGCCAGCGTTCGGG           | 108           |
| cyclin A1   | ccna1       | NM007628     | F: ATCCTGAACAGGGGGACAGA<br>R: GCATTGGGGAAACTGTGTTGA        | 135           |
| cyclin B1   | ccnb1       | NM172301     | F: GCTCTCCATGCTGGACTACG<br>R: TAGCCAGGTGCTGCATAACA         | 170           |
| cyclin D1   | ccnd1       | NM007631     | F: GCGTACCCTGACACCAATCT<br>R: CACAGACCTCCAGCATCCAG         | 160           |
| cyclin E1   | ccne1       | NM007633     | F: GGCAAATGTGGCCGTGTTTT<br>R: GGATGAAAGAGCAGGGGTCC         | 131           |
| cyclin E2   | ccne2       | NM001037134  | F: AGAGAAAAACAGCACAGGATGTC<br>R: ATGCAAGGGCTGATTCCTCC      | 115           |
| p35         | cdk5r1      | NM009871     | F: TGGCTTGGGGTTTGAAGTG<br>R: GGAAACCCTCCGCAGTATCTT         | 110           |
| Cdk1        | cdk1        | NM007659     | F: GTCCGTCGTAACCTGTTGAGT<br>R: ACCACACCGTAAGTACCTTCTC      | 78            |
| Cdk2        | cdk2        | NM016756     | F: CTGGGCTGCAAGTACTACTCC<br>R: CCTGCGGGTCAACATTTCA         | 78            |
| Cdk4        | cdk4        | NM009870     | F: GACCGATCCCCGGTGTATG<br>R: GAAGCAGGGGATCTTACGCT          | 98            |
| Cdk5        | cdk5        | NM007668     | F: ACCCAGCTACAACATCCTTGG<br>R: CGCTGCACAGGGTTACTT          | 97            |
| Cdk6        | cdk6        | NM009873     | F: ACCCACAGAAACCATAAAGGATA<br>R: GCGGTTTCAGATCACGATGC      | 95            |
